# Supplementary material for: Turning off the “shunt channel” by coating with CoFe layered double hydroxide nanocrystals for efficient photoelectrocatalytic water splitting
Source: Royal Society of Chemistry journal article supplement (doi:10.1039/d2qi00760f), 2022-01-01
Supplement: d2qi00760f1.pdf [file d2qi00760f1.pdf]

## Electronic Supplementary Information

### Turning off the “shunt channel” by coating with CoFe layered double hydroxide nanocrystalline for efficient photoelectrocatalytic water splitting

Peicheng Wei<sup>a</sup>, Yan Wen<sup>c</sup>, Kaifeng Lin<sup>b</sup>, Xin Li<sup>a,\*</sup>

<sup>a</sup> MIIT Key Laboratory of Critical Materials Technology for New Energy Conversion and Storage, School of Chemistry and Chemical Engineering, State Key Lab of Urban Water Resource and Environment, Harbin Institute of Technology, Harbin 150001, China

<sup>b</sup> MIIT Key Laboratory of Critical Materials Technology for New Energy Conversion and Storage, School of Chemistry and Chemical Engineering, Harbin Institute of Technology, Harbin 150001, China

<sup>c</sup> State Key Laboratory of Urban Water Resource and Environment, School of Environment, Harbin Institute of Technology, Harbin 150090, P. R. China.

\*Corresponding author: Xin Li

E-mail address: [lixin@hit.edu.cn](mailto:lixin@hit.edu.cn)

## Characterizations

UV-Vis absorption measurements were performed on Lambda 750 spectrophotometer (PerkinElmer). X-ray diffraction (XRD) test was performed with Empyrean Panalytical X'Pert Pro X-ray diffractometer. The morphologies of the as-prepared photoanodes and nanoparticles were observed by a field-emission scanning electron microscope (SEM, FEI HELIOS NanoLab 600i), a transmission electron microscope (TEM, TECNAI G2 F30). The transient photovoltage (TPV) measurement was carried out on a home-made instrument. X-ray photoelectron spectroscopy (XPS) and ultraviolet photoelectron spectroscopy (UPS) data were collected with an PHI 5400 ESCA System.

## Photoelectrochemical measurements

The photoelectrochemical performance of photoelectrodes were investigated in potassium borate buffer solution (0.1 M, pH=9.2) by using a three-electrode system with Ag/AgCl as the reference electrode ( $E_{\text{RHE}} = E_{\text{Ag/AgCl}} + 0.194 + 0.0591 \times \text{pH}$ ) and a Pt plate as the counter electrode at an electrochemical workstation (CH Instruments, model CHI660E). For photoelectrocatalytic measurement, a Xe lamp with an AM 1.5G filter was used as light source ( $100 \text{ mW cm}^{-2}$ ). Electrochemical impedance spectroscopy (EIS) curves were collected at bias potential of 0.8 V vs. RHE, with the frequency ranging from 100 kHz to 0.1 Hz and the modulation amplitude of 10 mV. The  $J$ - $V$  curves were collected by LSV mode (linear sweeping voltammetry) with a  $10 \text{ mV s}^{-1}$  scan rate .

The relative charge separation efficiency (relative  $\eta_{\text{sep}}$ ) was calculated using with

the equation (1) as below.

$$\eta_{\text{sep}} = J_{\text{Na}_2\text{SO}_3} / J_{\text{abs}} \times 100\% \quad (1)$$

According to the literature [24,27,28], to calculate the  $J_{\text{abs}}$ , AM 1.5G ( $\text{W} \cdot \text{m}^{-2} \cdot \text{nm}^{-1}$ , ASTM G173-03) simulated sunlight irradiance is converted to solar photocurrents vs. wavelength assuming 100% IPCE for photons, according  $\text{IPCE} = (1240 \times J_{\text{solar photocurrent}}) / (\lambda \times P_{\text{in}})$ ,  $\lambda$  is the absorption wavelength, and the  $P_{\text{in}}$  is the incident light intensity. Then the  $J_{\text{solar photocurrent}}$  are multiplied by the light harvesting efficiency (LHE) at each wavelength (from 380nm to 780nm), and the LHE was calculated according to  $\text{LHE} = 1 - 10^{-A(\lambda)}$ , where  $A(\lambda)$  is the absorbance at a specific wavelength in UV-Vis test.

The relative surface holes injection efficiency ( $\eta_{\text{Inj}}$ ) was calculated using the equation (2) as below.

$$\eta_{\text{Inj}} = J_{\text{H}_2\text{O}} / J_{\text{Na}_2\text{SO}_3} \times 100\% \quad (2)$$

Where  $J_{\text{H}_2\text{O}}$  and  $J_{\text{Na}_2\text{SO}_3}$  are the current measure without and with  $\text{Na}_2\text{SO}_3$  as hole scavenger respectively.

The ABPE (applied bias photon-to-current efficiency) was extracted from the J-V data under simulated sunlight illumination using the equation (3) as below, assuming 100% Faradaic efficiency.

$$\text{ABPE (\%)} = (J_{\text{light}} - J_{\text{dark}}) \times (1.23 - \text{RHE}) / P_{\text{light}} \times 100\% \quad (3)$$

Where  $J_{\text{light}}$  and  $J_{\text{dark}}$  are the current measured with and without illumination respectively. RHE is the applied potential vs. a reversible hydrogen electrode, and  $P_{\text{light}}$  is  $100 \text{ mW cm}^{-2}$  (simulated sunlight intensity).

The Faradaic efficiency was calculated using the equation (4) as below.

$$\text{Faradaic efficiency (\%)} = N_{\text{O}_2} / (Q / 4 / 96485) \quad (4)$$

Where  $N_{\text{O}_2}$  is the amount of  $\text{O}_2$  evolved,  $Q$  is the integrated charge passed.

### **Oxygen Evolution**

Controlled potential electrolysis experiments were performed in a 45 mL volume flask with 20 mL potassium borate buffer solution electrolyte (0.1 M, pH=9.2) as electrolyte. The electrode was used as the working electrode. The flask was sealed before experiments. After every 1 h illumination, 0.4 mL gas was taken from flask to injected into a gas chromatography for measuring the evolution of oxygen.

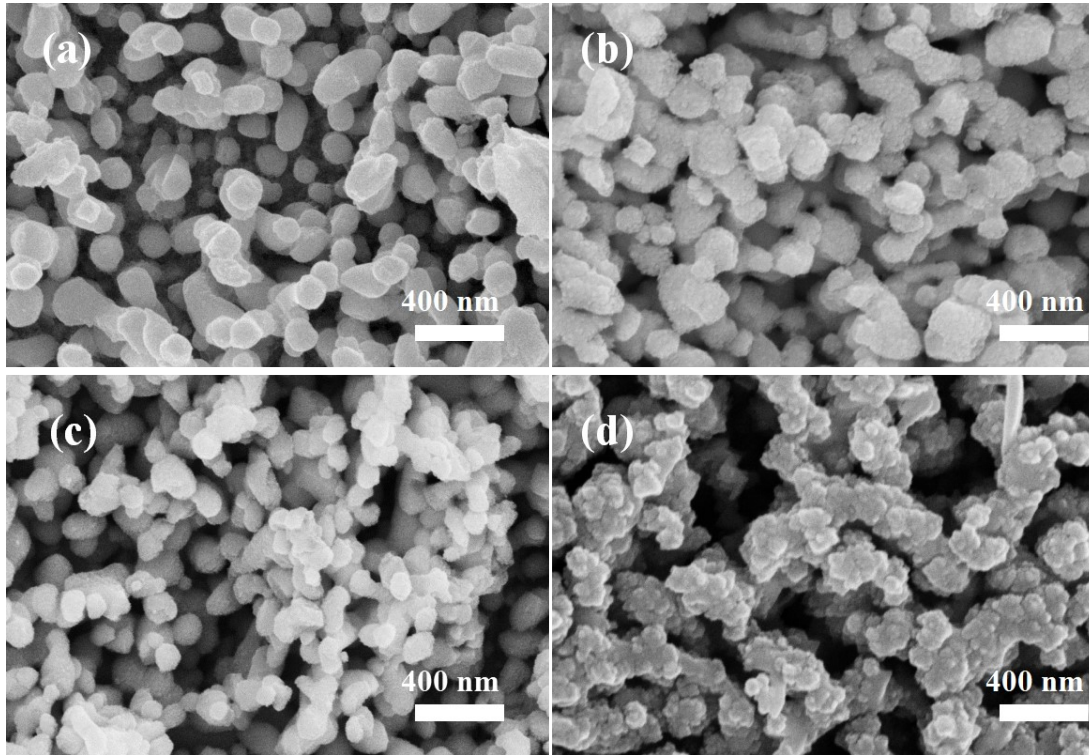

**Fig S1.** SEM image of CoFe(C)/BiVO<sub>4</sub> photoanodes under 4-16 h deposition time (a-d)

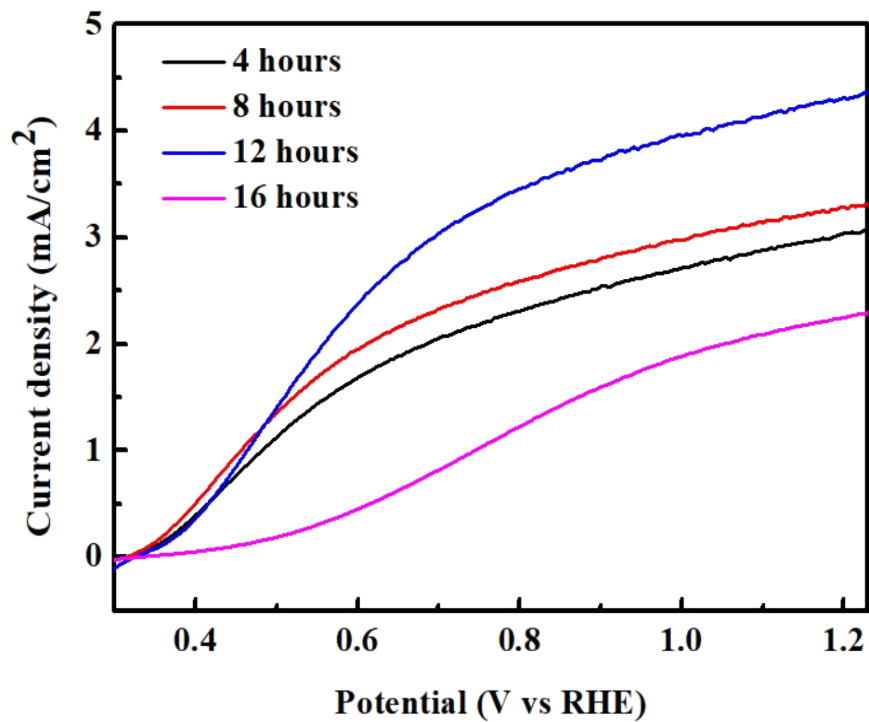

**Fig S2.** *J-V* of CoFe(C)/BiVO<sub>4</sub> photoanodes under different deposition time in 0.1 M

potassium borate buffer solution

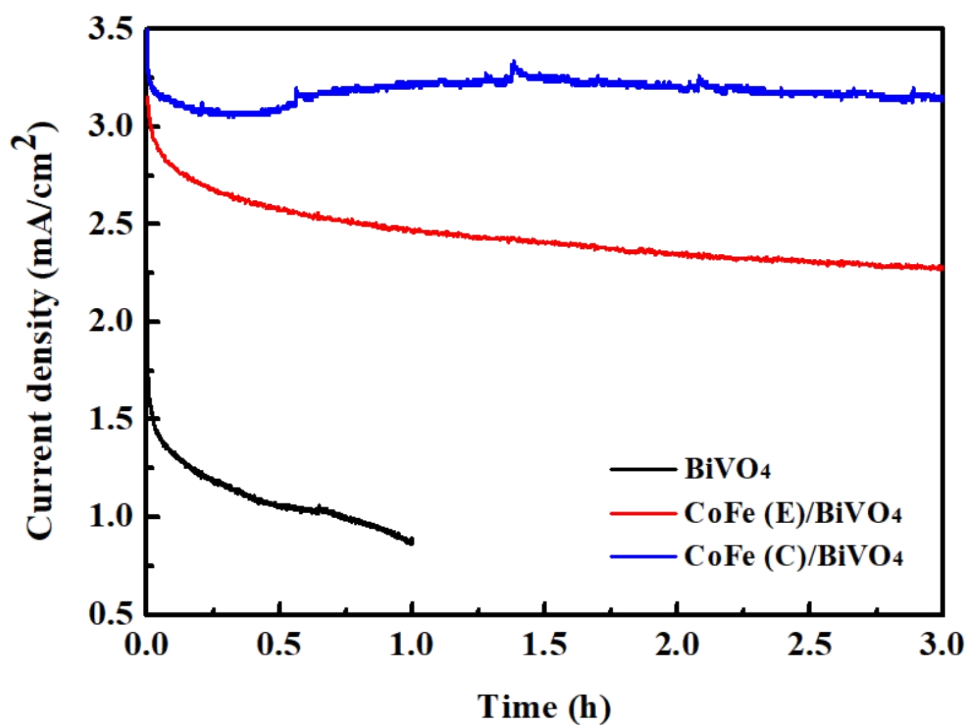

**Fig S3.** The  $J$ - $t$  plot of CoFe(C)/BiVO<sub>4</sub> photoanode for water oxidation at 0.7 V vs. RHE in 0.1 M potassium borate buffer solution under AM 1.5G illumination

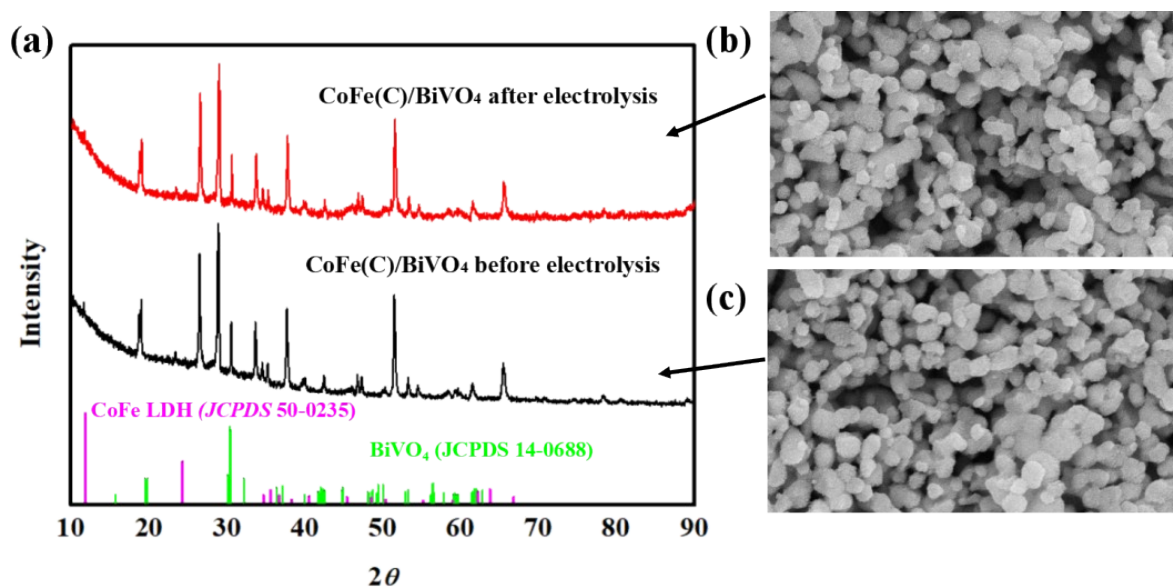

**Fig S4.** XRD patterns of (a) as-prepared CoFe(C)/BiVO<sub>4</sub> electrode before and after reaction for 3 hours. Corresponding SEM images are shown on the right (b,c).
